# Supplementary material for: Rapid Detection of Cr(VI) Using CuO/CN/LDH as an Oxidase Mimetic and the Construction of a Paper-Based Devices
Source: Research Square preprint supplement (doi:10.21203/rs.3.rs-8252032/v1), 2025-12-12
Supplement: Supplementary file 1 [file 1c613ba91f499abf69c079a6.docx]

**Rapid Detection of Cr(VI) Using CuO/CN/LDH as an Oxidase Mimetic and the Construction of Paper-Based Devices**

Shaohui Li1, Sijia Hao1, Wen li1, Ran Meng1, Qiang Wang1, Yuqing Wang1, Lei Wang1, Xinjing Liu1, Yuanyuan Zhou1, Haitong Wang1, Xibin Zhou1,*, Dongxia Zhang1,†

1 Key Laboratory of Resource Environment and Sustainable Development of Oasis, College of Geography and Environment Science, Northwest Normal University, Lanzhou 730070, China

E-mail address of Corresponding author:

*: zhouxb@nwnu.edu.cn (Xibin Zhou).

†: [zhangdongxia@nwnu.edu.cn](mailto:zhangdongxia@nwnu.edu.cn) (Dongxia Zhang1,†)


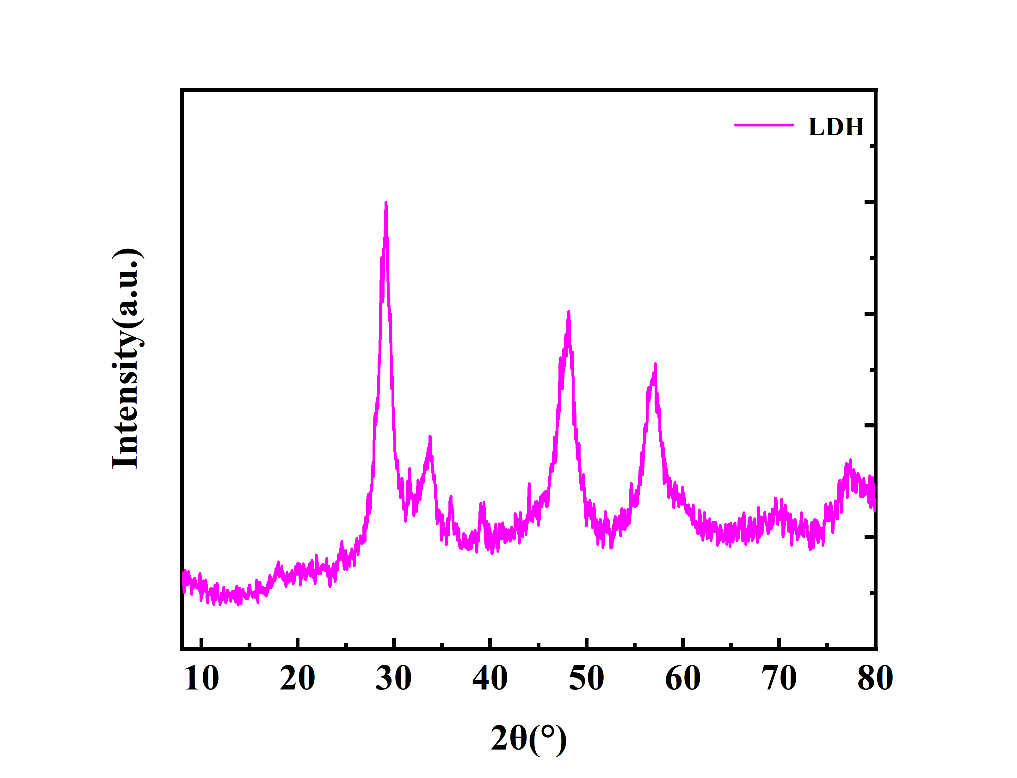


Fig. S1 XRD image of LDH


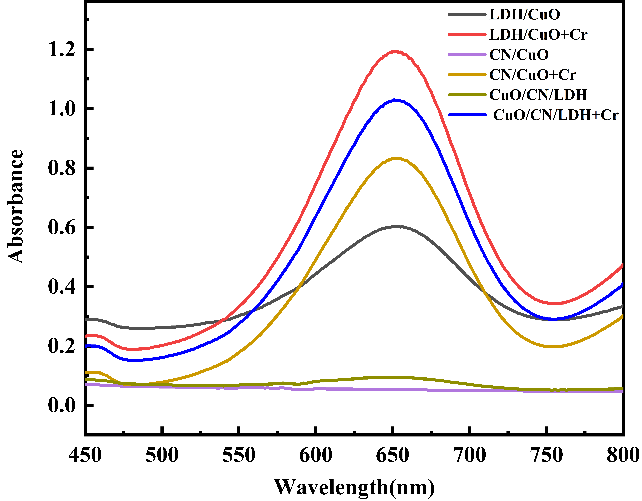


Fig. S2 Comparison of CuO/CN/LDH with intermediates and CuO-bound enzyme activities.


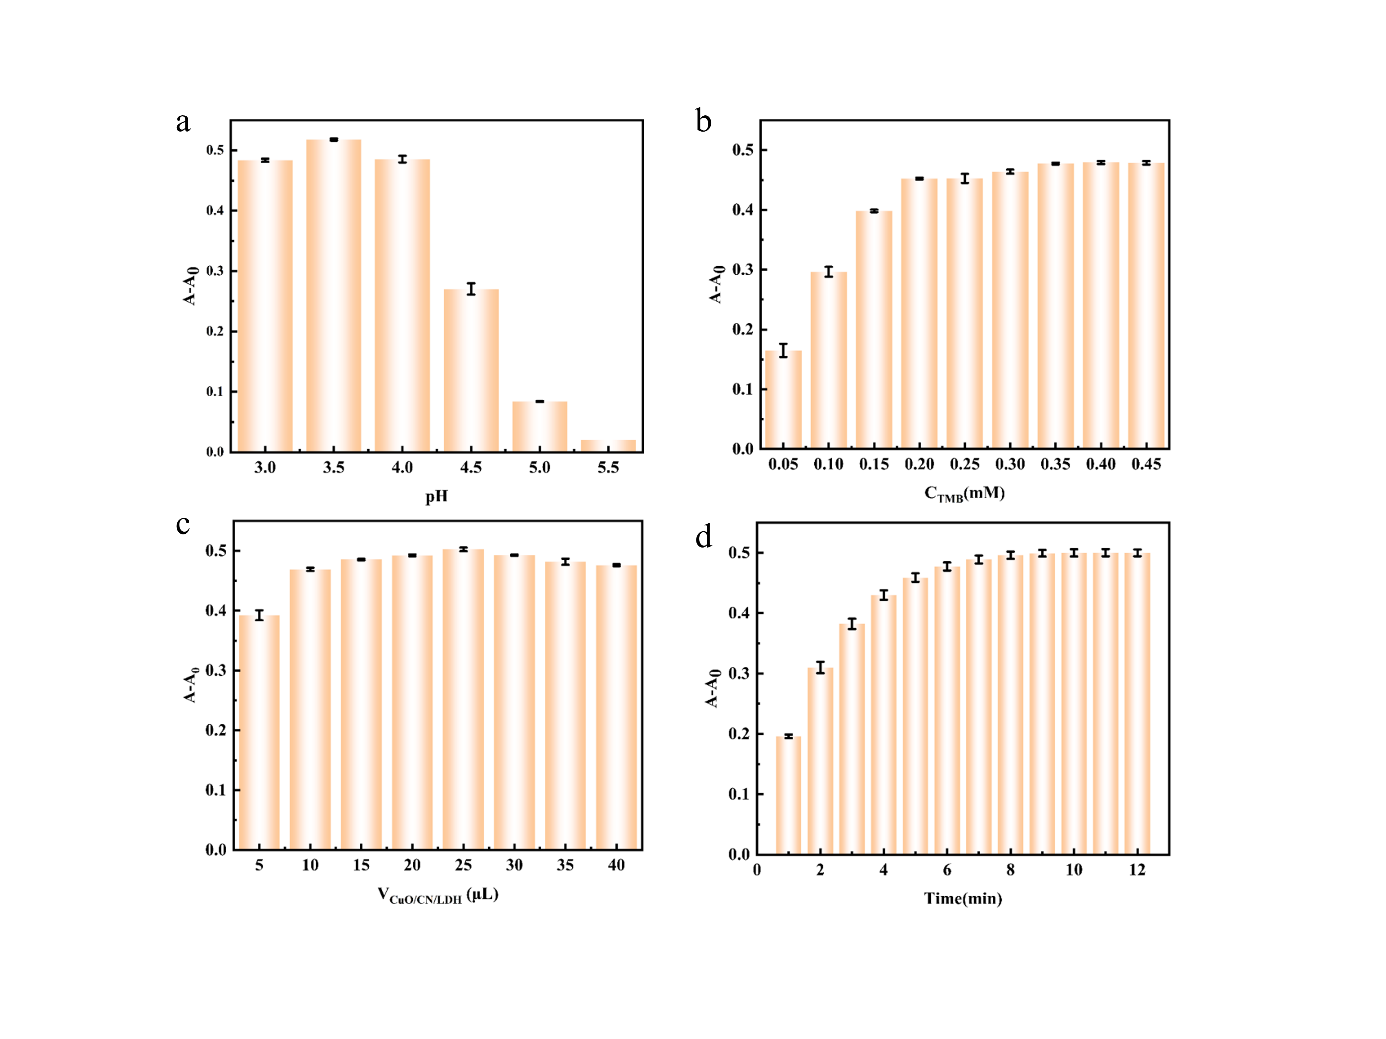


Fig. S3. (A) pH of the buffer; (B) concentration of TMB; (C) amount of material added; (D) reaction time (where A denotes the absorbance without HQ and A0 denotes the absorbance when Cr(Ⅵ) is added).


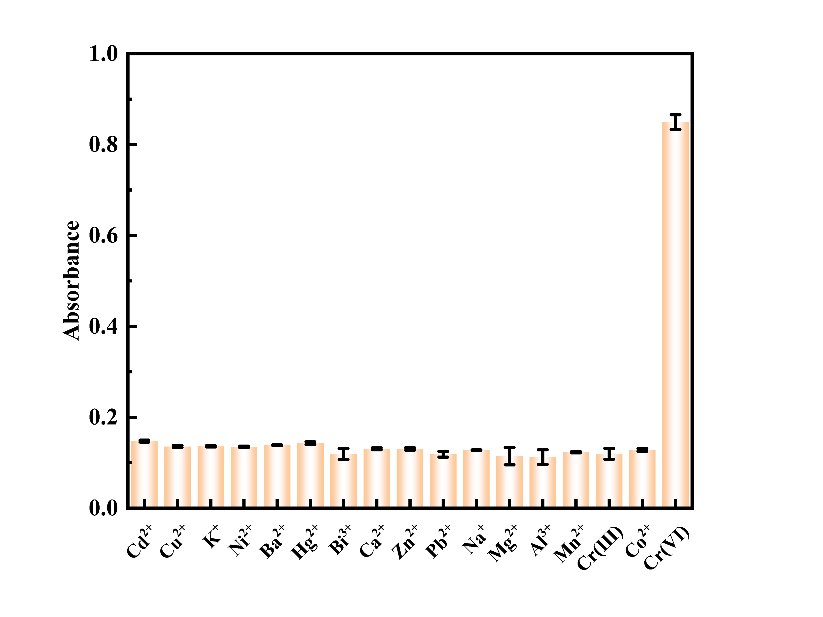


Fig. S4 The anti-interference performance of CuO/CN/LDH sensors


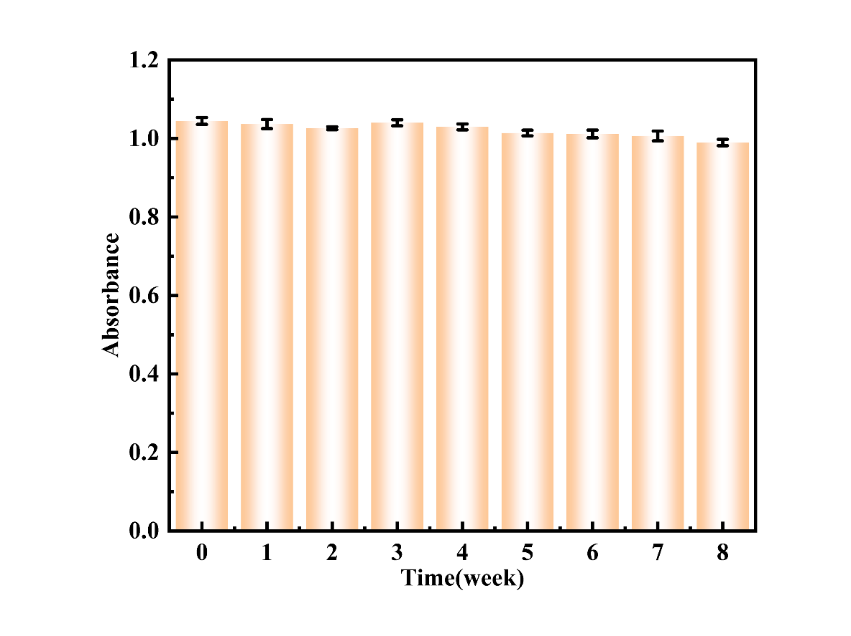


Fig. S5 Catalytic activity of CuO/CN/LDH over 8 weeks as a function of time;


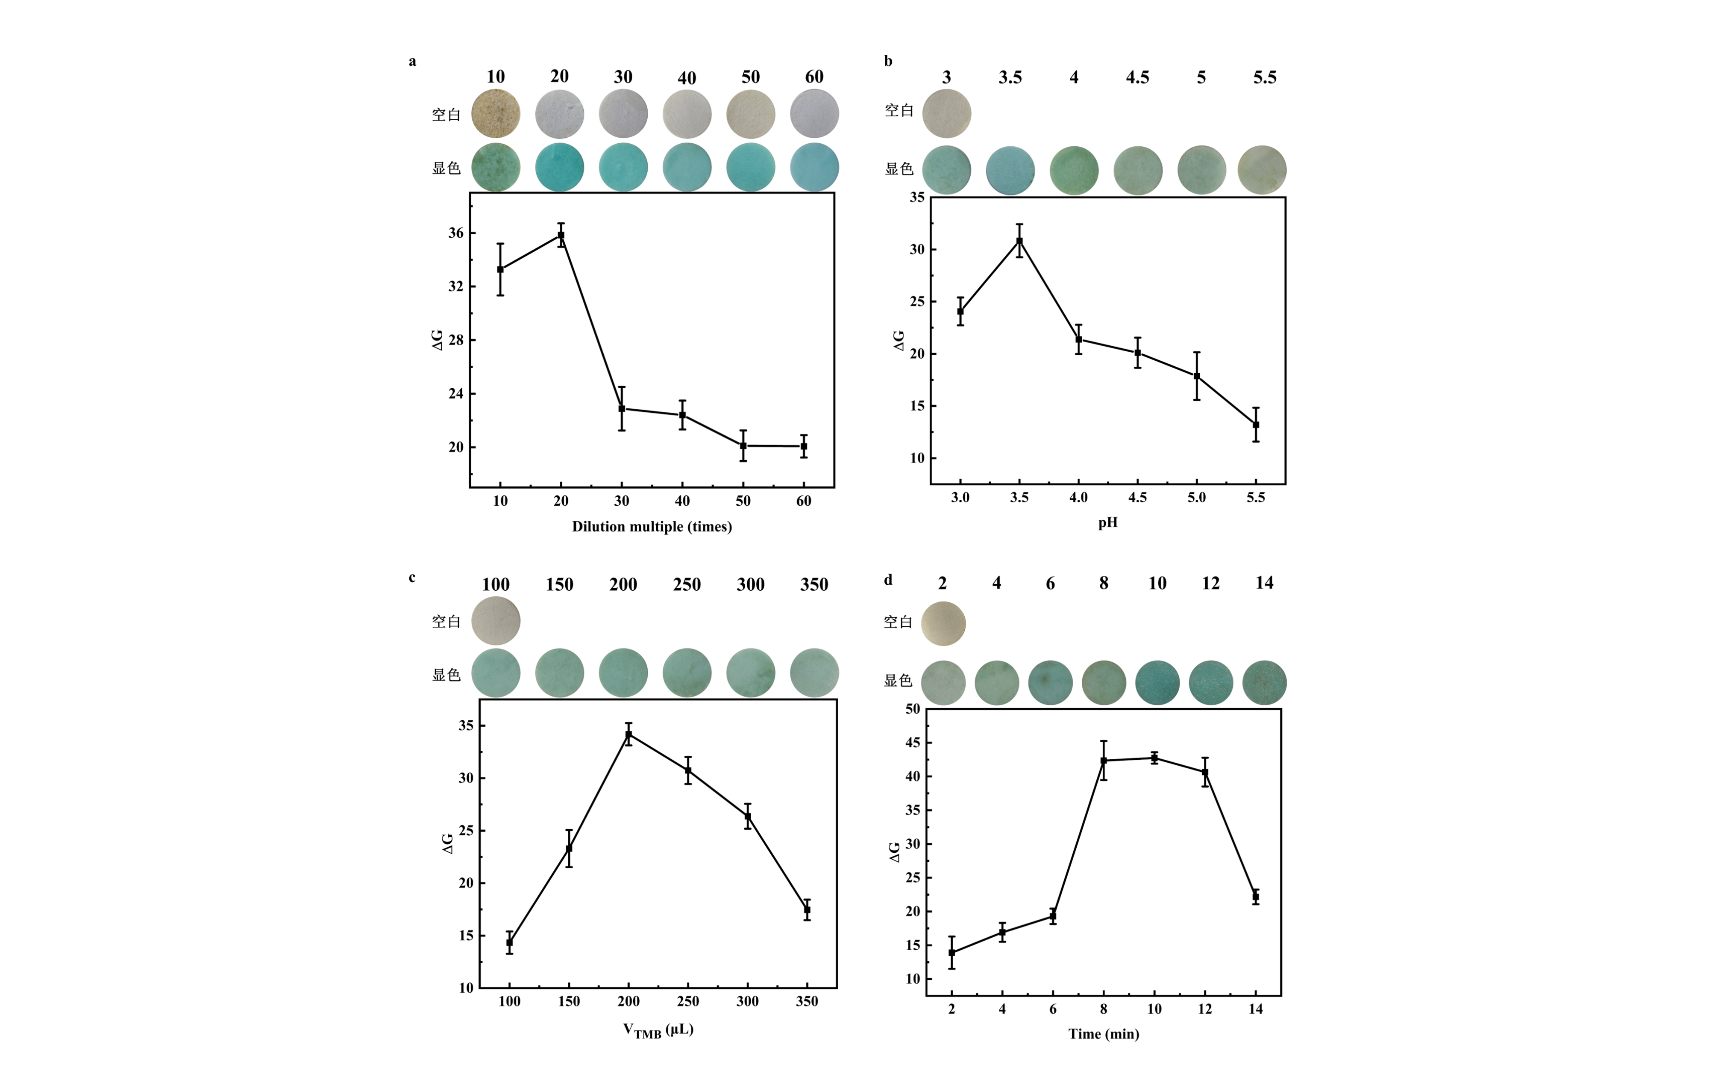


Fig. S6 (a) Optimization of Dilution Factor; (b) Optimization of Buffer Solution pH; (c) Optimization of Added TMB Volume; (d) Optimization of Development Time; (ΔG represents the difference in gray values before and after the reaction.)


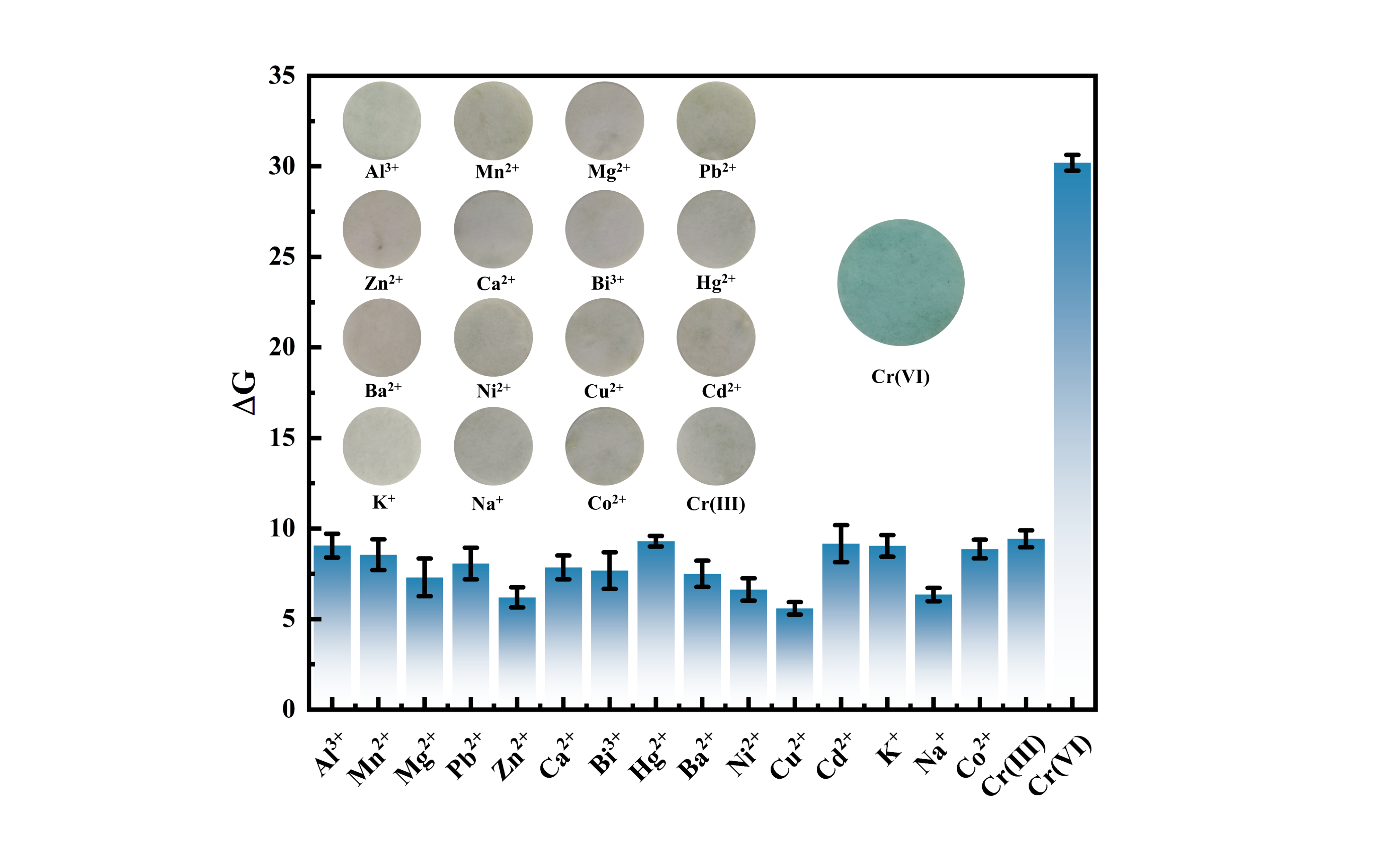


Fig. S7 Experiment of anti-interference of Cr(Ⅵ) by colorimetric detection of paper-based devices - metal ion


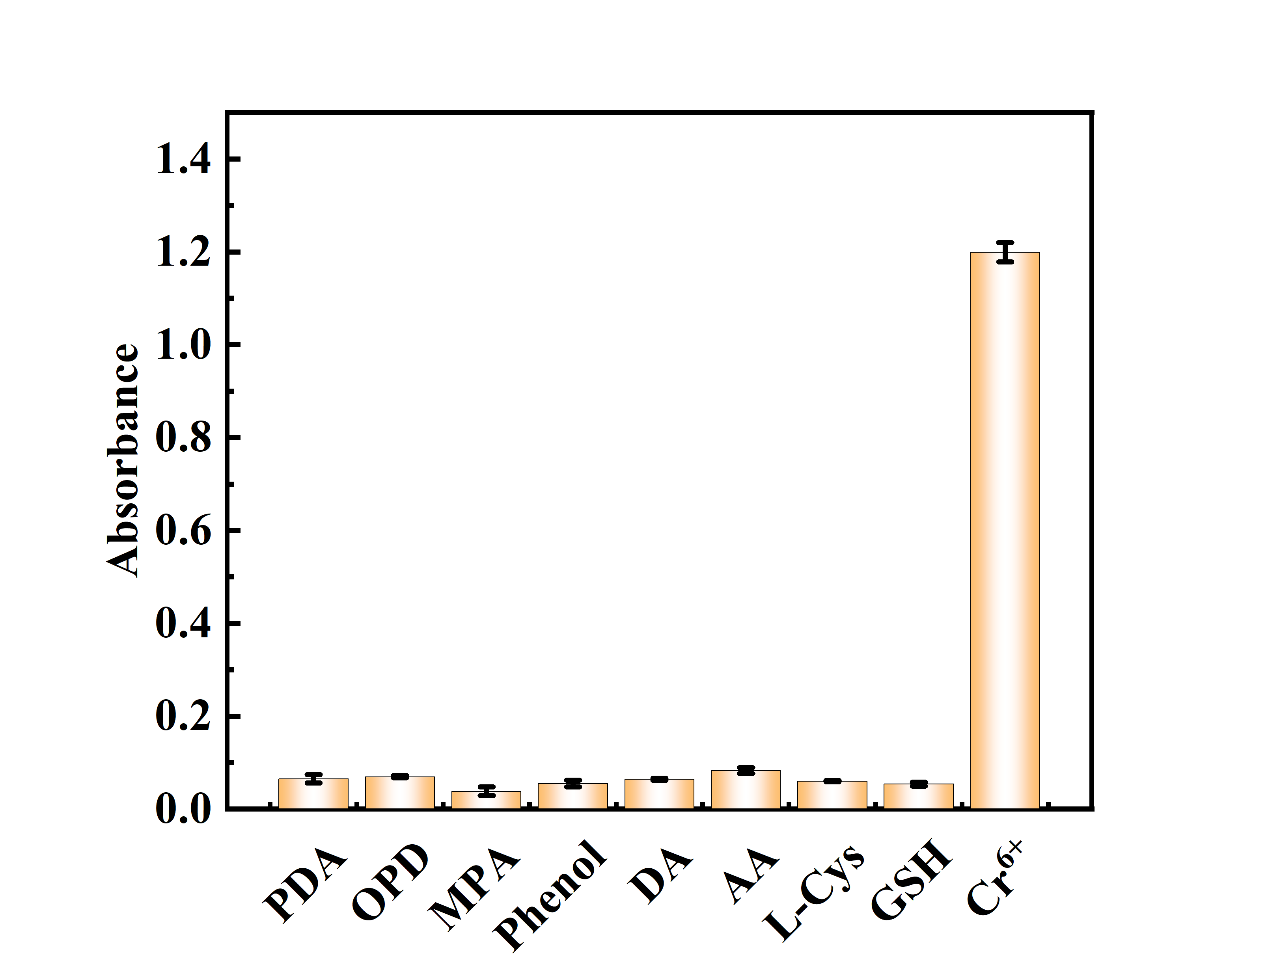


Fig. S8 Experiment of anti-interference of Cr(Ⅵ) by colorimetric detection of paper-based device - redox substances


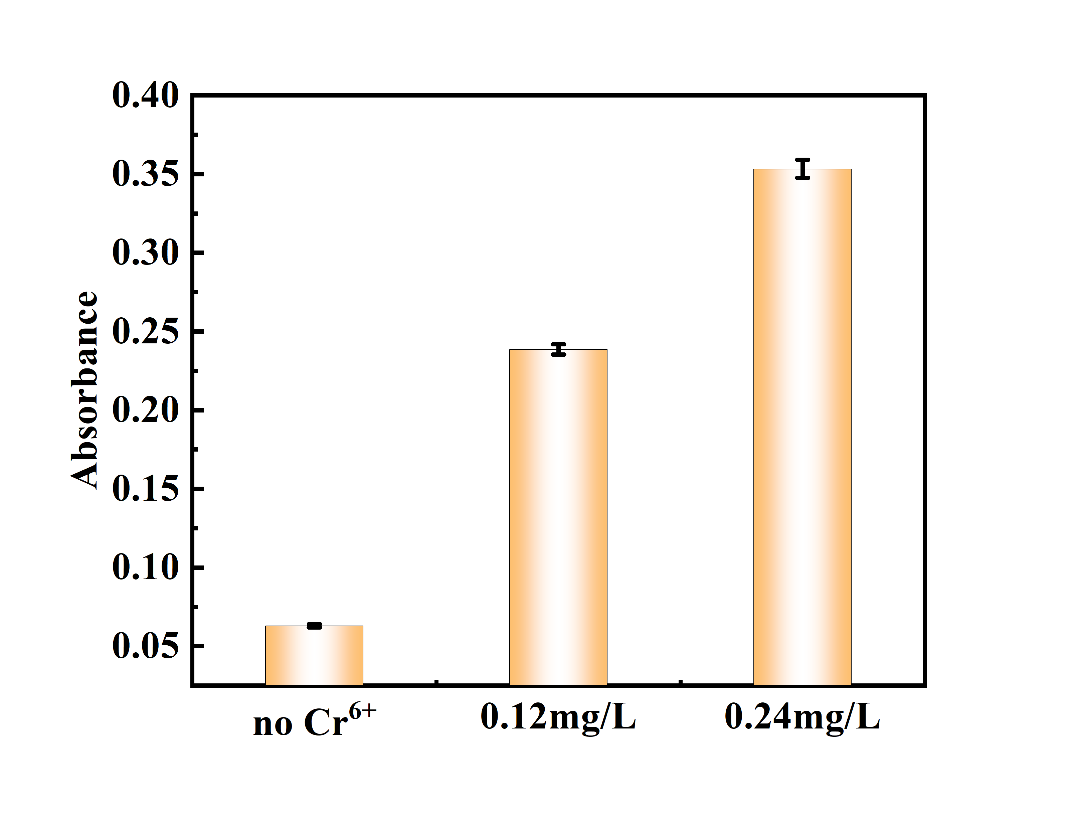


Fig. S9 Determination of Cr(Ⅵ) in standard sample(94 μg/L)

Table. S1 Comparison of reaction kinetic parameters with other nanoenzymes when CuO/CN/LDH mimics the activity of oxidase.

| Catalyst | Substrate | Km(mM) | Vmax(MS-1/10-8) | Ref |
| --- | --- | --- | --- | --- |
| CuO/CN/LDH | TMB | 0.173 | 4.702 | This word |
| HRP | TMB | 0.275 | 1.24 | [1] |
| Cu FMA | TMB | 1.10 | 1.79 | [2] |
| Cu-N-C | TMB | 0.101 | 1.60 | [3] |
| Fe-Zr-MOL | TMB | 1.39 | 9.10 | [4] |
| Au@Pt | TMB | 0.255 | 3.2 | [5] |

Table. S2 Comparison of this method with other methods for the determination of Cr(Ⅵ) in water samples.

| Materials | Detection range (μM) | LOD (μM) | Reference |
| --- | --- | --- | --- |
| CuO/CN/LDH | 0~9.1 | 0.025 | This word |
| Cal-CS/PEG/Ag | 0.09−20 | 0.079 | [6] |
| Starch-capped AgNPs | 0~6 | 0.93 | [7] |
| CeO2NRs-MOF | 0.03-5 | 0.02 | [8] |
| CuS-BSA | 0-100nM and  1-20μM | 50nm and 6.8μM | [9] |
| N-T/AuNPs | 0.5-2.5 | 0.07 | [10] |

References：

[1] Y. Song, K. Qu, C. Zhao, J. Ren, X. Qu, Graphene Oxide: Intrinsic Peroxidase Catalytic Activity and Its Application to Glucose Detection, Advanced Materials, 22 (2010) 2206-2210.

[2] M. Ying, G. Yang, Y. Xu, H. Ye, X. Lin, Y. Lu, H. Pan, Y. Bai, M. Du, Copper fumarate with high-bifunctional nanozyme activities at different pH values for glucose and epinephrine colorimetric detection in human serum, Analyst, 147 (2022) 40-47.

[3] Z. Lin, L. Zheng, W. Yao, S. Liu, Y. Bu, Q. Zeng, X. Zhang, H. Deng, X. Lin, W. Chen, A facile route for constructing Cu–N–C peroxidase mimics, Journal of Materials Chemistry B, 8 (2020) 8599-8606.

[4] Z. Wu, J. Wen, J. Li, L. Chen, W. Li, K. Yang, The engineering design of single-site nanozyme based on metal-organic layers for the detection of antioxidant substances, Materials Today Chemistry, 30 (2023) 101598.

[5] M. Qi, Y. Ke, Y. Li, P. Li, H. Zhou, X. Zhang, J. Chen, J. Meng, Au@Pt nanozyme-based smart hydrogel for visual detection of hyaluronic acid, Sensors and Actuators B: Chemical, 427 (2025) 137144.

[6] M. Liu, S. Zhang, Y. Wang, J. Liu, W. Hu, X. Lu, Hexavalent Chromium as a Smart Switch for Peroxidase-like Activity Regulation via the Surface Electronic Redistribution of Silver Nanoparticles Anchored on Carbon Spheres, Analytical Chemistry, 94 (2022) 1669-1677.

[7] W. Sapyen, S. Toonchue, N. Praphairaksit, A. Imyim, Selective colorimetric detection of Cr(VI) using starch-stabilized silver nanoparticles and application for chromium speciation, Spectrochimica Acta Part A: Molecular and Biomolecular Spectroscopy, 274 (2022) 121094.

[8] Y. Wang, R.-P. Liang, J.-D. Qiu, Nanoceria-Templated Metal Organic Frameworks with Oxidase-Mimicking Activity Boosted by Hexavalent Chromium, Analytical Chemistry, 92 (2020) 2339-2346.

[9] A. Swaidan, P. Borthakur, P.K. Boruah, M.R. Das, A. Barras, S. Hamieh, J. Toufaily, T. Hamieh, S. Szunerits, R. Boukherroub, A facile preparation of CuS-BSA nanocomposite as enzyme mimics: Application for selective and sensitive sensing of Cr(VI) ions, Sensors and Actuators B: Chemical, 294 (2019) 253-262.

[10] J. Du, H. Ge, Q. Gu, H. Du, J. Fan, X. Peng, Gold nanoparticle-based nano-probe for the colorimetric sensing of Cr3+ and Cr2O72− by the coordination strategy, Nanoscale, 9 (2017) 19139-19144.
